# 1 A Computational Model of Bidirectional 2 Axonal Growth in Micro-Tissue Engineered 3 Neuronal Networks (micro-TENNs)

---

4 Toma Marinov<sup>1</sup>, Liang Yuchi<sup>1</sup>, Dayo O. Adewole<sup>3,4,5</sup>, D. Kacy Cullen<sup>3,4,5</sup>, Reuben H. Kraft<sup>1,2</sup>

5  
6 <sup>1</sup> Penn State Computational Biomechanics Group, Mechanical and Nuclear Engineering,  
7 Pennsylvania State University, University Park, PA, USA, <sup>2</sup> Department of Biomedical  
8 Engineering, Pennsylvania State University, University Park, PA, USA, <sup>3</sup> Center for Brain Injury  
9 & Repair, Department of Neurosurgery, Perelman School of Medicine, University of  
10 Pennsylvania, Philadelphia, PA, USA, <sup>4</sup> Department of Bioengineering, School of Engineering &  
11 Applied Science, University of Pennsylvania, Philadelphia, PA, USA, <sup>5</sup> Center for Neurotrauma,  
12 Neurodegeneration & Restoration, Corporal Michael J. Crescenz Veterans Affairs Medical  
13 Center, Philadelphia, PA, USA.

## 14 Abstract

15 Micro-Tissue Engineered Neural Networks (Micro-TENNs) are living three-dimensional  
16 constructs designed to replicate the neuroanatomy of white matter pathways in the brain, and  
17 are being developed as implantable microtissue for axon tract reconstruction or as anatomically-  
18 relevant *in vitro* experimental platforms. Micro-TENNs are composed of discrete neuronal  
19 aggregates connected by bundles of long-projecting axonal tracts within miniature tubular  
20 hydrogels. In order to help design and optimize micro-TENN performance, we have created a  
21 new computational model including geometric and functional properties. The model is built upon  
22 the three-dimensional diffusion equation and incorporates large-scale uni- and bi-directional  
23 growth that simulates realistic neuron morphologies. The model captures unique features of 3D  
24 axonal tract development that are not apparent in planar outgrowth, and may be insightful for  
25 how white matter pathways form during brain development. The processes of axonal outgrowth,  
26 branching, turning and aggregation/bundling from each neuron are described through functions  
27 built on concentration equations and growth time distributed across the growth segments. Once  
28 developed we conducted multiple parametric studies to explore the applicability of the method  
29 and conducted preliminary validation via comparisons to experimentally grown micro-TENNs for  
30 a range of growth conditions. Using this framework, this model can be applied to study micro-  
31 TENN growth processes and functional characteristics using spiking network or compartmental  
32 network modeling. This model may be applied to improve our understanding of axonal tract  
33 development and functionality, as well as to optimize the fabrication of implantable tissue  
34 engineered brain pathways for nervous system reconstruction and/or modulation.

## 35 Introduction

36 Various neural tissue engineering tools have been created to model and study the development  
37 of neuronal networks *in vitro*. Among them are micro-tissue engineered neural networks (micro-  
38 TENNs), which are three-dimensional (3D) living constructs comprised of long-projecting axonal

39 tracts and discrete neuronal populations within a microscopic, hollow hydrogel cylinder  
40 (microcolumn) filled with an extracellular matrix (ECM) [1]. Preformed clusters of neuronal cell  
41 bodies (aggregates) are housed at one or both ends of the microcolumn, with axons growing  
42 longitudinally through the hydrogel lumen (**Figure 1**). This segregation of long axonal tracts and  
43 neuronal cell bodies approximates the network architecture of the central nervous system by  
44 replicating the anatomy of gray matter and white matter pathways referred to as the  
45 “connectome”. Micro-TENNs may be fabricated with a range of neuronal subtypes and physical  
46 properties, yielding a controllable yet biofidelic microenvironment for studying 3D neural  
47 networks *in vitro*. As such, micro-TENNs are being developed in parallel as (1) self-contained,  
48 bioengineered implants to reconstruct compromised pathways in the brain, and (2) biofidelic  
49 test-beds for studying various neuronal phenomena (e.g. growth, synaptic integration, circuit  
50 development, pathological responses) [1]–[5]. Towards the former, prior work has shown that  
51 micro-TENNs are capable of survival, maintenance of architecture, neurite outgrowth, and  
52 host/implant synaptic integration out to at least 1 month following implant in adult rats [3]–[6].

53  
54 To advance micro-TENNs’ capabilities as an *in vitro* test-bed and/or to rebuild the damaged  
55 connectome, one of our design goals is to develop a computational platform that can be used to  
56 design and optimize micro-TENNs for specific performance goals. To be able to investigate  
57 neuronal growth, neurite extension, and the formation of synaptic connectivity at the distal ends,  
58 we need a simulation framework that can generate large-scale unidirectional and bidirectional  
59 axonal outgrowth with realistic neuron morphologies. The applications of this computational  
60 framework in micro-TENNs include: (i) study processes involved in outgrowth and structural  
61 integration in 3D microenvironments; (ii) aid in the design and optimization of functional  
62 characteristics and predict performance (e.g., output for a given input); (iii) simulate detailed  
63 neuron morphologies and anatomically-relevant neuronal-axonal networks to study  
64 connectome-level functional connectivity via spiking or compartmental network modeling.  
65 Combining the anatomical simulation results and the study of functional connectivity will  
66 increase our ability to understand and predict the neurophysiological characteristics and  
67 network-level activity in the micro-TENNs.

68  
69 There are two major approaches to simulate neuronal development: construction algorithms and  
70 biologically-inspired growth processes [7]. Construction algorithms aim to reproduce the shape  
71 of real dendritic trees from distributions of shape parameters [8], [9]. However, this approach  
72 lacks the insight into any underlying biophysical mechanisms, such as the influences on  
73 morphological development caused by different neuronal types [10], a neuron’s intracellular  
74 environment and interaction with other neurons. Stochastic growth models, which provide a  
75 description of the growth process based on probabilistic growing events [11]–[14], is a popular  
76 approach under construction algorithms. Biologically-inspired growth processes are based on a  
77 description of the underlying biophysical mechanisms of the dendritic development [10], [15],  
78 [16]. The studies were conducted within various aspects of development, such as cell migration  
79 [17], neurite extension [18], growth cone steering [19], [20] and synapse formation [21].

80  
81  
82 In this paper, we present an ad-hoc growth model built upon the diffusion principle, which  
83 incorporates the stochastic process to reproduce the shape of micro-TENNs tissue. In that  
84 sense it belongs to the construction algorithms, however it does not rely on experimentally  
85 determined shape parameters. Our approach uses the 3D diffusion equation imposed with  
86 various rules for individual neuronal growth, such as the actions of neurite extension, branching,

87 turning and aggregation/bundling. The concentration gradients guide the development of the  
 88 axonal and dendritic neurites and describe the competition for resources between different  
 89 growth tips of individual dendrites or axons.

90

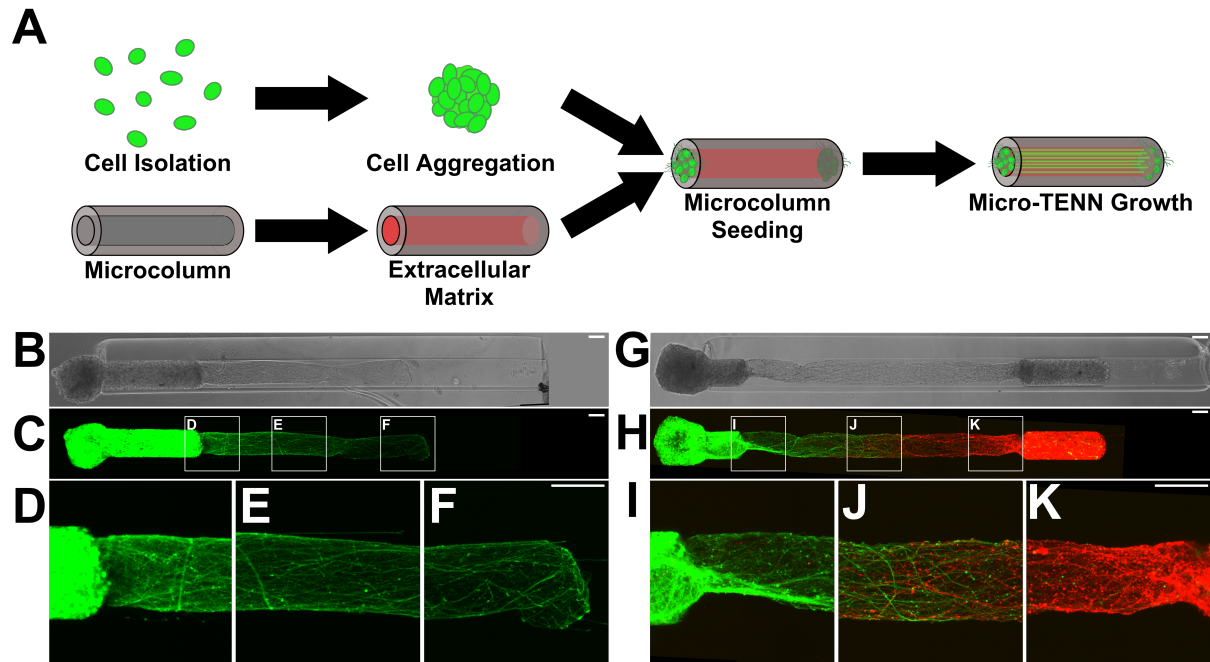

**Figure 1. Micro-TENNs as living, 3D neuronal-axonal constructs.** (A) Micro-TENNs are fabricated in a three-step process. Neurons are isolated and forced into spherical aggregates via gentle centrifugation (top). Simultaneously, single-channel microcolumns are cast from hydrogel to a predetermined inner and outer diameter and filled with an extracellular matrix (ECM) comprised of collagen and laminin (bottom). Next, ECM-filled microcolumns are seeded with either 1 aggregate or 2 aggregates to form either unidirectional or bidirectional micro-TENNs, respectively. Micro-TENNs are then grown *in vitro*. (B) Phase microscopy image of a unidirectional, GFP-positive micro-TENN at 5 days *in vitro* (DIV). (C-F) Confocal micrograph of same micro-TENN from (B). Axons can be seen projecting from the neuronal aggregate (D) and extending through the ECM-filled microcolumn (E, F). (G) Phase micrograph of a bidirectional micro-TENN at 5 DIV. The two aggregates have been individually transduced to express GFP (left) and mCherry (right), allowing for identification and monitoring of aggregate-specific processes. (H-K) Confocal micrograph of the micro-TENN from (G), showing axons projecting from each aggregate (I, K) and growing along each other (J). Scale bars: 100  $\mu$ m.

91

## 92 Methods

### 93 Micro-TENN Fabrication and Experimental Measurements

94 Micro-TENNs were generated as previously described [4]. Briefly, agarose (3% w/v) was cast in  
 95 a custom-designed acrylic mold to yield microcolumns with an outer diameter of 345 or 398  $\mu$ m  
 96 and inner diameter of 180  $\mu$ m. Microcolumns were UV-sterilized and cut to a specified length  
 97 before the lumen was filled with an ECM comprised of rat tail collagen 1 (1 mg/mL) and mouse  
 98 laminin (1 mg/mL) adjusted to a pH of 7.2-7.4 (Reagent Proteins, San Diego, CA). To create the  
 99 neuronal aggregates, embryonic day 18 (E18) cortical neurons were isolated from rodents and  
 100 dissociated. The resultant single-cell suspensions were added to custom PDMS pyramidal wells  
 101 and centrifuged at 200 x g for 5 minutes to force the cells into spheroidal aggregates. Following

102 24h incubation at 37°C/5% CO<sub>2</sub>, aggregates were seeded within the microcolumns to generate  
103 unidirectional (with one aggregate) and bidirectional (with one aggregate at each end) micro-  
104 TENNs. Micro-TENNs were then grown at 37°C/5% CO<sub>2</sub> with half-media changes every 48  
105 hours. To fluorescently label aggregates, adeno-associated virus 1 (AAV1) was sourced from  
106 the Penn Vector Core (Philadelphia, PA), packaged with the human synapsin 1 promoter and  
107 either green fluorescent protein (GFP) or the red fluorescent protein mCherry, and added to the  
108 pyramidal wells containing the aggregates (final titer: ~3x10<sup>10</sup>). Aggregates were kept at 37°C,  
109 5% CO<sub>2</sub> overnight before being seeded in micro-columns as described.

110 During the design and early development of the model, unidirectional and bidirectional micro-  
111 TENNs were generated with approximately 15-30E<sup>3</sup> neurons per aggregate and lengths ranging  
112 from 2.0-9.0mm (n = 39), with growth rates analyzed as described [5]. To identify aggregate-  
113 specific axons over time, a set of 3.0mm-long, bidirectional “dual-color” micro-TENNs were  
114 simultaneously generated such that one aggregate expressed green fluorescent protein (GFP)  
115 while the opposing aggregate expressed mCherry (n = 6). Finally, for quantitative validation of  
116 the growth model, 2.0mm-long, unidirectional micro-TENNs were transduced to express GFP  
117 and generated with approximately 20E<sup>3</sup> neurons per aggregate (n = 6) or 8.0E<sup>3</sup> neurons per  
118 aggregate (n = 6) for characterization as described below. Micro-TENNs were imaged under  
119 phase contrast microscopy (magnification: 10x) at 1, 3, 5, 8, and 10 days in vitro (DIV) using a  
120 Nikon Eclipse Ti-S microscope paired with a QIClick camera and NIS Elements BR 4.13.00  
121 (National Instruments). In addition to phase contrast microscopy, the bidirectional dual-color  
122 micro-TENNs were imaged at 1, 2, 3, 5, and 7 DIV using a Nikon A1RSI Laser Scanning  
123 confocal microscope paired with NIS Elements AR 4.50.00.

124 To quantify micro-TENN growth rates over time, the longest identifiable axons were measured  
125 from phase images at each DIV using ImageJ (National Institutes of Health, MD). Lengths were  
126 measured from the leading edge of the source aggregate (identified at 1 DIV) to the neurite tip,  
127 and growth was measured until axons from the aggregate either spanned the micro-TENN  
128 length (unidirectional) or began to grow along axons from the opposing aggregate  
129 (bidirectional). Growth rates were averaged at each timepoint to obtain a growth profile for  
130 unidirectional micro-TENNs with 20E<sup>3</sup> and 8.0E<sup>3</sup> neurons/aggregate. The peak growth rates for  
131 each group were compared using an unpaired t-test, with p < 0.05 set as the baseline for  
132 statistical significance.

133 To characterize axonal density with respect to cell count, phase images of unidirectional micro-  
134 TENNs with either 20E<sup>3</sup> (n = 6) or 8.0E<sup>3</sup> (n = 6) neurons/aggregate at 5 DIV were imported into  
135 ImageJ. 10-µm long rectangular regions of interest (ROIs) spanning the inner diameter (final  
136 ROI dimensions: 180 µm x 10 µm) were taken at 50% and 75% of the micro-TENN lengths. The  
137 axon density at these two locations was quantified as the percentage of the ROI populated by  
138 axons. Densities were averaged for the 20E<sup>3</sup> and 8.0E<sup>3</sup> groups and compared at each location  
139 via unpaired t-test with p < 0.05 as the baseline for significance. All data presented as mean ±  
140 s.e.m.

141 To characterize axon distribution, unidirectional micro-TENNs were fabricated and labeled with  
142 GFP (n = 5). At 10 DIV, micro-TENNs were gently drawn into a 22-gauge needle and vertically  
143 injected into a block of “brain phantom” agarose (0.6% w/v). Micro-TENNs were injected such  
144 that the aggregate was ventral with axon tracts projecting downward. Post-injection, micro-  
145 TENNs were imaged on a Nikon A1RMP+ multiphoton confocal microscope paired with NIS  
146 Elements AR 4.60.00 and a 16x immersion objective. Micro-TENNs were imaged with a 960-nm



147 laser, with sequential 1.2 $\mu\text{m}$ -thick slices taken along the longitudinal axis (i.e. X-Y projections  
148 along the micro-TENN length). Post-imaging, the X-Y projections were used to generate a 3D  
149 reconstruction of the micro-TENN; cell bodies, axon bundles, and single axons were then  
150 manually identified via co-registration of the X-Y projections and 3D structure.

## 151 Computational Model Development

152 The elongation and the growth direction of the neurites in the model is guided by concentration  
153 gradients. Each tip of each neuron is a diffusion source in free space. The bifurcation of the  
154 neurites is assumed to be a stochastic process, i.e. branching is associated with a time  
155 dependent probability function at each node. This framework aims to emulate the growth and  
156 bifurcation of micro-TENN neurons, however by using simple diffusion principles, it avoids the  
157 underlying biological complexity. All of the tips of the neurite tree are assumed to participate in  
158 the extension and branching process. Furthermore, extension and branching of each node are  
159 modeled as independent processes. This has computational advantages such as improved  
160 speed and ability to parallelize on a large scale.

161 The model uses continuous space/discrete time approach to allow freedom in the outgrowth  
162 direction and elongation. Space is bounded by the inner diameter of the hydrogel micro-column.  
163 The diameter and length of the tubular hydrogels, 180  $\mu\text{m}$  and 2 mm respectively, are based on  
164 experiments previously performed by the Cullen Lab [1], [3]. In the micro-TENNs, axonal  
165 extension was measured approximately every two days; as such, the size of the fixed time  
166 interval of the model is 1% of this two-day interval (i.e. 28.8 minutes). In each time step, each  
167 individual axonal tip may (i) extend, (ii) bifurcate into two daughter branches and (iii) change  
168 growth direction. In the present implementation, the model uses fixed time steps with functions  
169 built upon the diffusion equation and concentration gradients for extension, turning, and  
170 branching. The model is developed with the condition that extension rate and turning direction  
171 depend on the concentration gradients at the terminal segment of each axon. The extension  
172 rate decreases exponentially to zero value [12] as the neurites stop growing due to the limitation  
173 of space and essential biochemical factors [14]. Branching probabilities are growing as a  
174 function of the simulation time.

175

## 176 Modeling Setup: Diffusion Equation and Concentration Gradient

177 Many stochastic models of neuronal activity are based on the theory of diffusion processes [22].  
178 Several models have been developed to describe the growth of single neurons using the theory  
179 of one-dimensional stochastic diffusion [23]–[27].

180 In our bidirectional growth model, the tips of the neurons are diffusion sources in free space,  
181 assuming a constant isotropic diffusion coefficient. The governing equation is:

$$182 \quad D\nabla^2 C = \frac{dC}{dt}, \quad (1)$$

183 where  $D$  is the diffusion coefficient ( $\text{mm}^2/\text{s}$ ),  $C$  is the concentration ( $\text{mol}/\text{mm}^3$ ), and  $t$  is time  
184 (s). In Cartesian coordinates the partial differential equation becomes:

$$185 \quad D \left( \frac{d^2 C}{dX^2} + \frac{d^2 C}{dY^2} + \frac{d^2 C}{dZ^2} \right) = \frac{dC}{dt} \quad (2)$$

186 with boundary conditions:

187  
188  $C|_{x,y,z \rightarrow \infty} = 0$  (3)

189  
190  $\frac{dC}{dx}|_{x \rightarrow \infty} = 0, \frac{dC}{dy}|_{y \rightarrow \infty} = 0, \frac{dC}{dz}|_{z \rightarrow \infty} = 0$  (4)

191  $\int_{-\infty}^{\infty} \int_{-\infty}^{\infty} \int_{-\infty}^{\infty} C(x, y, z, t) dx dy dz = M$  (5)

192  $M$  is the initial amount of matter (*mol*). Without loss of generalization, we can choose  $M = 1$  for  
193 convenience. The initial condition for a point source  $(X_0, Y_0, Z_0)$  inside the shell is:

194  $C(t = 0) = \delta(X - X_0)\delta(Y - Y_0)\delta(Z - Z_0),$  (6)

195 where  $\delta(X)$  is Dirac's delta function.

196 Thus, the general solution of the diffusion equation becomes:

197  $C(x, y, z, t) = \left( \frac{1}{(4\pi t D)^{\frac{3}{2}}} \right) \left( e^{-\left( \frac{x^2}{4Dt} + \frac{y^2}{4Dt} + \frac{z^2}{4Dt} \right)} \right)$  (7)

## 198 Direction of Neurite Outgrowth

199 The outgrowth of neurites is a complex process that is far from fully understood. In actual  
200 biological processes, the outgrowth direction of neurites depends on many intracellular and  
201 extracellular cues, which may cause large fluctuations in outgrowth directions [28], [29].

202 Our model is a Markov process: it assumes that the new outgrowth direction depends on the  
203 previous outgrowth direction and on the concentration gradients of the growth tips. For each  
204 growth tip, the concentration gradients are normalized to preserve the Markovian nature of the  
205 model.

206 The outgrowth direction is:

207  $D_2 = D_1 + S_1 \nabla C + S_2 E_1,$  (8)

208 where  $S_1$  is the sensitivity to concentration gradients,  $S_2$  is the sensitivity to the direction  
209 perturbation,  $D_1$  is the previous direction vector,  $\nabla C$  is the normalized concentration gradient,  
210 and  $E_1$  is the stochastic direction perturbation term.

211 Besides the gradients, a stochastic term  $E_1$  in Equation 8 is introduced to cause small  
212 fluctuations in the growth direction. Controlling this term in the simulation allows the control of  
213 the magnitude of deviation of the growth direction. Therefore, the component in the axial  
214 direction of the cylindrical tube has the largest value, while the components in the radial  
215 direction are relatively small.

216

## 217 Rate of Neurite Extension

218 The rate of extension of a neurite may vary considerably and is determined both by the external  
219 environment and by the internal state of the neurite [30]–[36]. In general, the extension rate  
220 decreases gradually with increasing distance from the soma [16]. In our model, the description  
221 of neurite extension rate follows the trend of experimental growth rate measured in

222 unidirectional micro-TENNs. In each time step, the elongation of a single neurite is represented  
223 by the function,

$$224 \quad L = At^2 \left( v_{0_{grad}} \nabla C + v_0 E_2 \right) 2^{-\frac{t}{\tau}} \quad (9)$$

225  $v_{0_{grad}}$  is the growth rate related to the gradients.  $v_0$  is the base extension rate and  $E_2$  is random  
226 process to cause fluctuation in  $v_0$ .  $t$  is the simulation time,  $\tau$  controls decreasing speed of the  
227 extension rate and  $A$  is a scaling factor.

228

## 229 Growth Tip Position

230 The coordinates at the next step of a growth tip are determined by the coordinates from the  
231 previous step, the outgrowth direction, and the extension rate. The new position in each time  
232 interval is given by

$$233 \quad P_2 = P_1 + D_2 L \quad (10)$$

234 where  $P_1$  is the current tip position. However, this tip migration position cannot be accepted until  
235 it satisfies the coordinate restrictions of radial constraint and overlap avoidance.

236

## 237 Branching Probability, Rate of Branching, and Growth Rate After Branching

238 Neurite branching patterns are complex and show a large degree of variation in their shapes .  
239 Random branching on the segment indeed results in large and characteristic variations in the  
240 structures of the tree. As previous research has highlighted [12], [37], branching is assumed to  
241 occur exclusively at terminal nodes. Our model describes branching as a stochastic process.  
242 For each time step, for each of the terminal nodes in the growing tree, a branching probability  $p_j$   
243 to form two new daughter nodes in a given time interval is assigned.

244 The probability of a branching event at each given terminal node  $j$  is given by:

$$245 \quad p_j = \left( 1 - e^{-\frac{t-t_{ib}}{\tau_b}} \right) P b \quad (11)$$

246 The time-dependent branching probability  $p_j$  of a given terminal node  $j$  is dependent on several  
247 terms: the steady state branching probability  $P b$  ( $P b|_t = \omega$ ), simulation time  $t$ , the branching  
248 time step  $t_{ib}$ , and a branching time constant  $\tau_b$ . The equation assumes that the branching  
249 probability of terminal nodes per time step remains constant for all tips. Branching probabilities  
250 are growing with the total simulation time. Such a function was necessary to match the shape of  
251 increasing number of dendritic terminal nodes during outgrowth of the micro-TENNs. The  
252 stochastic process of branching is also restricted by another random value  $E_3$ ; branching could  
253 only occur when both  $p_j$  and  $E_3$  are greater than a certain value  $B$ . The value of  $B$  can be  
254 determined by the branching probability from experimental data. When a branching event takes  
255 place, two daughter terminal nodes are instantaneously added to the end of the existing  
256 terminal segment [38], which then becomes an intermediate segment.

257 The growth rate of the generated trees is closely related with segment outgrowth direction and  
258 extension. We only consider the extension distance in the axis direction as the growth distance.

259 Thus, the growth rate is determined by the difference between the  $z$  components of the nodes.  
260 In the model, we force the growth cones to extend preferentially in the axis direction and the  
261 turning is relatively small. Therefore, the segment extension rate is the strongest factor to  
262 determine the growth rate. An estimate of  $v_0$ , and  $\tau$  is obtained from the experimental growth  
263 rate. The optimization of the elongation parameters involves a comparison of the experimental  
264 and model segment extension rate.

265  
266 With the current implementation, the branching probability increases with simulation time. The  
267 steady-state branching probability  $Pb$  and time constant  $\tau_b$  are supposed to be extracted from  
268 experimental images. By controlling the values the values of  $Pb$  and  $\tau_b$ , we have control over  
269 the morphology of the simulated neurites, since  $Pb$  controls the branching density and  $\tau_b$ ,  
270 controls how early in the process branching begins. In the extreme case of  $Pb = 0$ , we can  
271 generate a morphology with no branching.

## 272 Radial Constraint

273 Experimentally, micro-TENNs were grown within miniature tubular hydrogels. In the simulation,  
274 the outgrowth process is also restricted within the tubular space (in this particular case, 180  
275 micrometers in diameter [1], [3]), however the model allows different simulation radii to be  
276 employed. At each time step, the radial components of all the terminal nodes are tracked. If a  
277 radial component of a given node does not satisfy the tubular constraint, the node will be re-  
278 oriented to stick on the tubular wall.

## 279 Overlap Avoidance

280 The branches and extensions of neighboring neurites often target a shared or adjacent position.  
281 All the neurites are competing for space and avoiding overlap. Space competing is achieved by  
282 the concentration gradients. Overlapping is avoided by checking the distance from the new  
283 position to the surrounding existing segment tips. The model re-orientes the growth direction  
284 when the extend position is sufficiently close to others.

## 285 Bundling and Helicity

286 The model accommodates fiber bundling. This is achieved through an attraction term  $A$ , i.e. the  
287 new position in each time interval becomes:

$$288 \quad D_2 = D_1 + S_1 \nabla C + S_2 E_1 + S_3 A, \quad (12)$$

289 where  $S_3$  is a sensitivity to attraction (values between zero and one) that controls the bundle  
290 formation. In order to construct the attraction term  $A$ , we introduce an attraction radius of  
291 influence ( $RI$ ). Every tip that falls within the  $RI$  is attracted to the centroids of all the tips that are  
292 within the  $RI$ . Larger values of  $RI$  lead to the formation of fewer bundles and vice versa. Thus,  
293 selection of different values of  $RI$  allows different morphologies with a different number of  
294 bundles. The model naturally provides an additional feature: tips belonging to a given bundle  
295 that fall outside of the  $RI$  at a given time step can form their own bundle, effectively allowing for  
296 a bundle to split. Such an effect is observed experimentally.

297 Helicity is another feature that was introduced to the model aiming to reproduce observed  
298 experimental micro-TENN morphologies. Very often, single axons and axonal bundles once  
299 reaching the inner wall of the micro-column, form a helix. Our model allows control over both the  
300 slope of the helix formed by an axon (or axonal bundle), as well as its helicity (handedness).

## 301 Parameter Optimization

302 Finding a best fit of the model-generated neuronal morphologies with an experimental data set  
303 requires an iterative comparison of experimental and model shape properties. In the search  
304 strategy, some parameters in the model are directly related to properties of the experimental  
305 data or images. For instance, the parameters  $v_{0_{grad}}$ ,  $v_0$ , and  $\tau$  predict the growth rate in axis  
306 direction. The branching process governed by parameters  $\tau_b$ ,  $P$  and  $B$  fully determine the  
307 topological structure of the generated trees. These parameters are directly related to segment  
308 branching rate. The time step is selected to be  $\Delta t = 0.02$  days. Since  $v_0$  is extracted from the  
309 experimental data, the selection of the value of the diffusion coefficient  $D$  is guided by the  
310 restriction:

$$311 \quad D \leq \frac{1}{2} \frac{L_0^2}{\Delta t}, \quad (13)$$

312 where  $L_0 = L(t = 0)$  is the initial extension.

313 Finally, the simulations were carried out on a laptop (Windows 10 Enterprise 64, Intel i7-  
314 7700HQ CPU @ 2.80GHz, 2801 Mhz, 4 Cores, 16GB DDR3 RAM). All code with is freely  
315 available at: <https://github.com/PSUCompBio/GrowthModel>.

## 316 Results

### 317 Examples of Micro-TENNs Morphologies

318 Variation of model parameters like sensitivity to attraction  $S_3$  and radius of influence  $RI$  allows  
319 us to generate different morphologies.  $S_3$  takes continuous values between zero and one, with  
320  $S_3 = 0$  corresponding to no bundle formation and  $S_3 = 1$  corresponding to tight bundle  
321 formation.  $RI$  controls the number of bundles formed. **Figures 2, 3 and 4** demonstrate various  
322 unidirectional and bidirectional morphologies for different values of  $RI$  and  $S_3$  for micro-TENNs  
323 seeded with 3000, 6500 and 10000 cells.

324



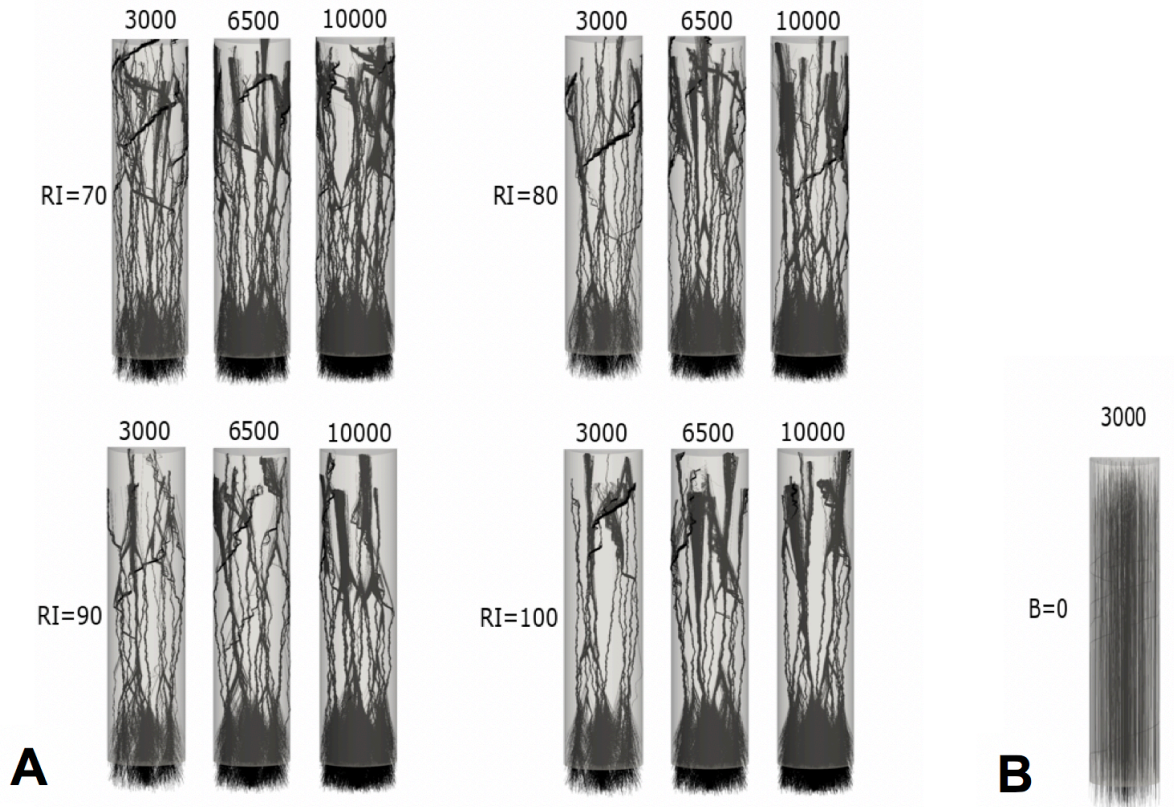

325

326 **Figure 2. Example of unidirectional model-generated micro-TENN morphologies:** (A) Twelve morphologies for  
327 micro-TENNs of length  $L=2000 \mu m$  and radius  $R=180 \mu m$ , number of seeded cells 3000, 6500 and 10000, and  
328 RI=70, 80, 90 and 100  $\mu m$ , respectively.  $S_3=1$  causes tight bundle formation. (B)  $S_3=0$  guarantees no bundle  
formation.

328

329

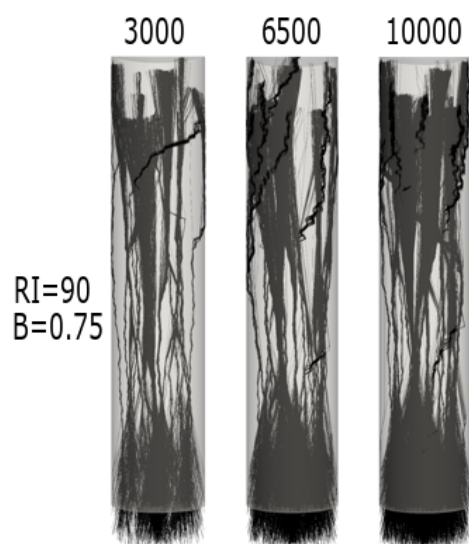

330

**Figure 3. Example of unidirectional model-generated micro-TENNs:** Micro-TENNs of length  $L=2000 \mu m$  and radius  $R=180 \mu m$ , number of seeded cells 3000, 6500 and 10000, and  $RI=90 \mu m$ . Here  $S_3=0.75$ , bundles are not compact.

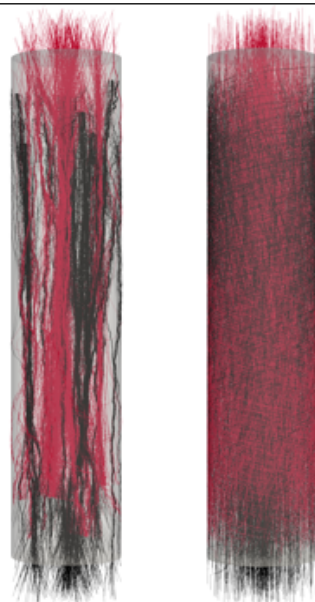

331

332

333

334

335

**Figure 4. Example of bidirectional model-generated micro-TENNs:** Analogously to the unidirectional case, the model can generate bidirectional morphologies. The micro-TENNs have length  $L=2000 \mu m$  and radius  $R=180 \mu m$ , the number of seeded cells is 3000. Here  $S_3=1$  and  $RI=90 \mu m$  shows bidirectional axonal bundle formation (left), in the case  $S_3=0$  no bundles are formed (right). FIGURE SHOULD DENOTE NEURONAL CELL BODY (AGGREGATE) END ON BOTH SIDES, BUT THEN THE CAPTION SHOULD SAY THAT THE AGGREGATES ARE OMMITTED FOR CLARITY.

### 336 Experimental Validation of Axonal Growth Rate

337 The model simulated the growth processes for unidirectional and bidirectional micro-TENNs  
 338 when grown to 2000  $\mu\text{m}$ . **Figure 5** shows images of unidirectional micro-TENNs of  
 339 approximately 8000 and 2000 neurons, as well as measured and computed growth rate. The  
 340 optimized parameters,  $v_0 = 15$ ,  $v_{0_{grad}} = 0.008$  and  $E_2$  is a random uniform value between 0.8  
 341 and 1, provided an excellent fit with the experimental data. The result show that extension rate  
 342 first increases, then decreases slowly with increasing distance from the soma. This is the trend  
 343 for both the unidirectional and bidirectional growth rates.

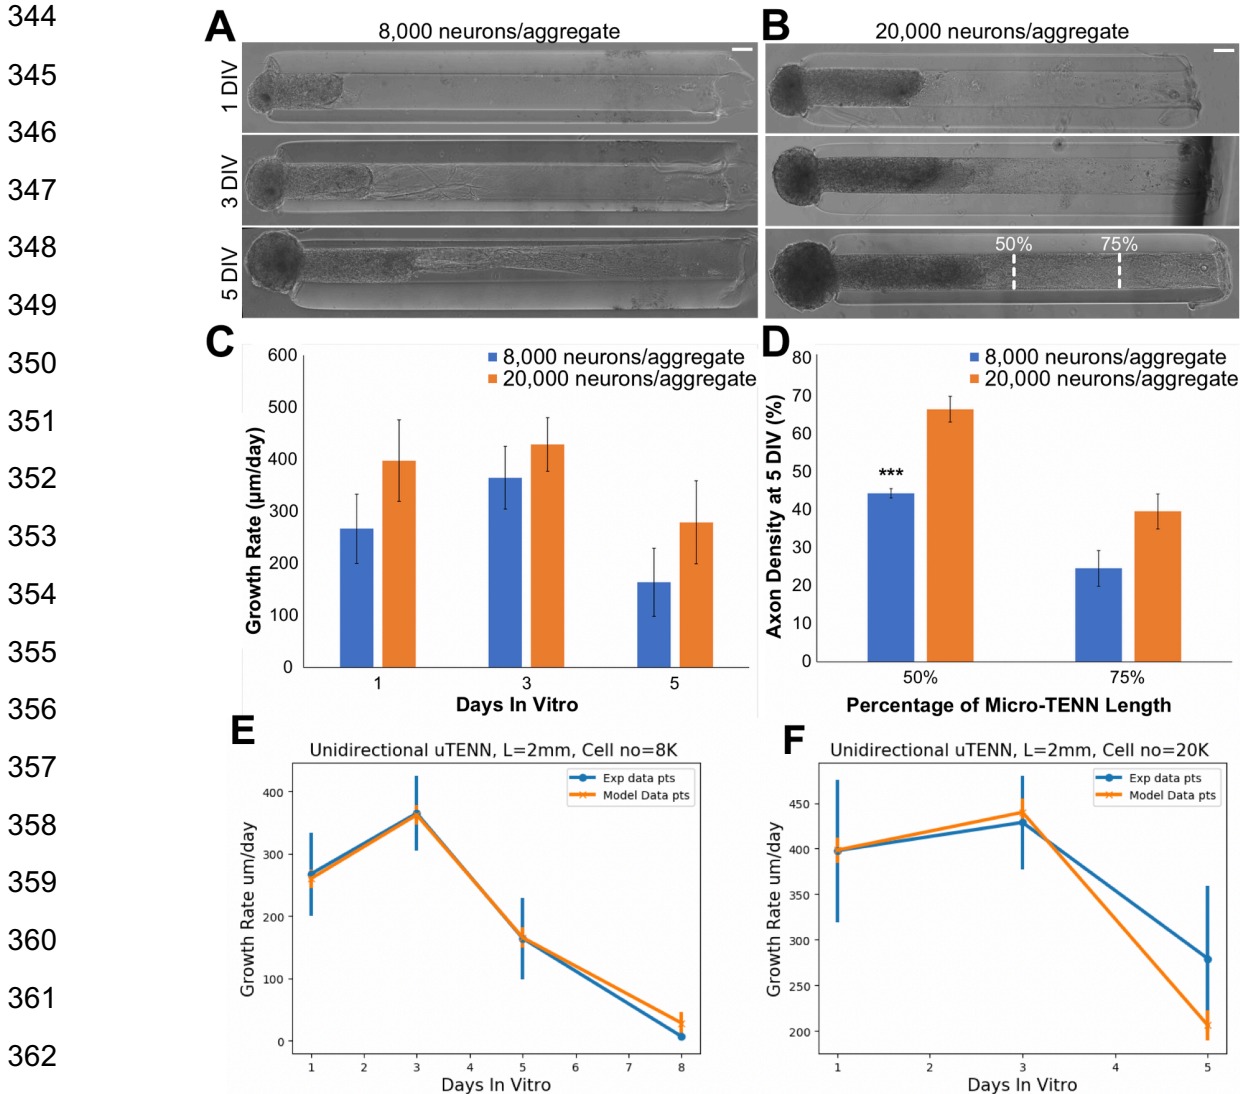

**Figure 5. Validation of simulated growth rates *in vitro*.** (A) Phase images of a unidirectional micro-TENN with approximately 8,000 neurons at 1, 3, and 5 DIV. (B) Phase images of a unidirectional micro-TENN with approximately 20,000 neurons at 1, 3, and 5 DIV. Both micro-TENN groups exhibited rapid axonal growth over the first few DIV. Scale bars: 100  $\mu\text{m}$ . (C) Growth rates from both micro-TENN groups at 1, 3, and 5 DIV. Micro-TENNs with ~20,000 neurons/aggregate exhibited qualitatively faster growth rates than those with ~8,000 neurons/aggregate, although there were no statistically significant differences in growth rates. (D) Axon density at 5 DIV across the two groups at 50% and 75% along the micro-TENN length (as illustrated in (B)), quantified as the percentage of the microcolumn channel occupied by axons. Micro-TENNs with ~20,000 neurons/aggregate showed higher axon densities than those with ~8,000 neurons/aggregate, although this was only significant at 50% along the micro-TENN length (\*\*\*) =  $p < 0.001$ ). (E) Experimental versus model growth rate for unidirectional micro-TENN with 8,000 neurons. (F) Experimental versus model growth rate for unidirectional micro-TENN with 20,000 neurons.

368 **Figure 6A** shows a 3D reconstruction of a unidirectional micro-TENN at 10 DIV. Four  
369 corresponding slices were extracted for cross-sectional comparison to the computed results.  
370 **Figure 6 B-E** show each slice and provide arrows to distinguish between neuronal cell bodies,  
371 axon bundles, and single axons. In order to compare morphologies, we use two model  
372 generated X-Y projections along the Z-axis (**Figure 7**) that resulted from a micro-TENN  
373 simulation (inner radius  $180 \mu\text{m}$ , length of 2mm, the number of seeded cells is 20,000). The  
374 model generates realistic morphology with single axons and axon bundles along the inner wall  
375 comparable to the experimentally reconstructed morphology in **Figure 7**.

376

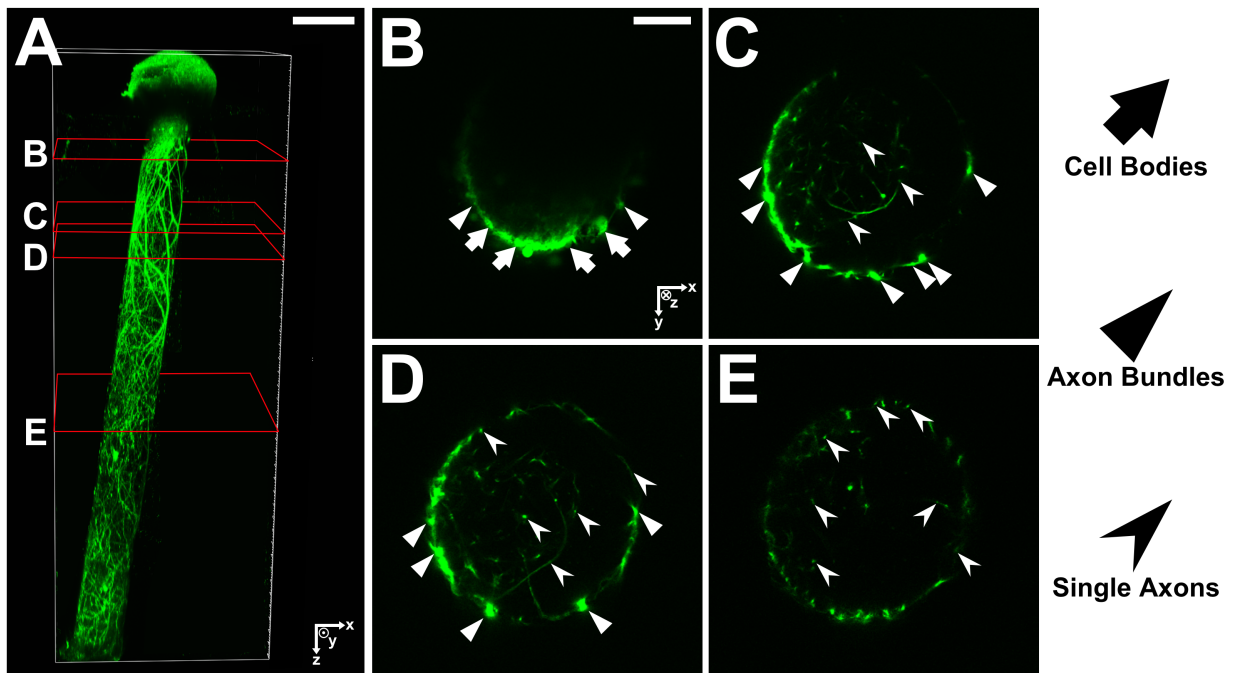

**Figure 6.** (A) 3D reconstruction of a unidirectional, GFP-positive micro-TENN at 10 DIV. (B-E) X-Y projections of the micro-TENN from (A) at the sections outlined in red. Orientation of the z-axis (positive) is into the page. Neuronal cell bodies (arrows) can be seen near the aggregate region in (B), from which axonal bundles (triangles) project and split into individual axons (caret). Scale bars:  $200 \mu\text{m}$  (A);  $50 \mu\text{m}$  (B).

377  
378  
379  
380  
381  
382  
383  
384  
385



386  
387  
388  
389  
390  
391  
392  
393  
394  
395  
396

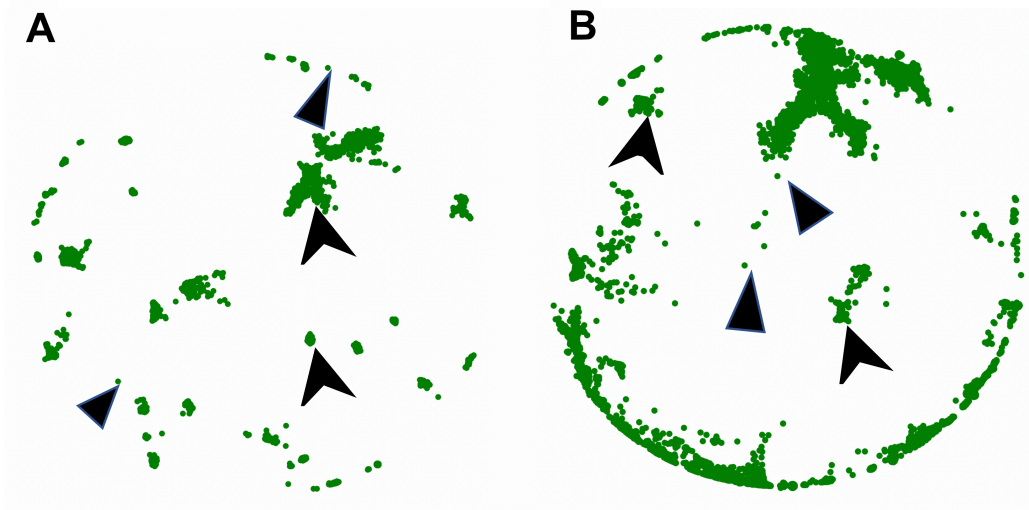

**Figure 7.** Model generated morphology of a unidirectional micro-TENN with inner diameter of 180  $\mu\text{m}$ , length of 2mm and approximately 20,000 neurons. **(A)** X-Y projection at Z= 910  $\mu\text{m}$ , model **(B)** X-Y projection at Z=1380  $\mu\text{m}$ , model.

397  
398  
399  
400

The computational algorithm, employed by our model is scalable as demonstrated on **Figure 8**, which shows the simulation runtime as a function of simulated number of cells (100, 1000 and 10000).

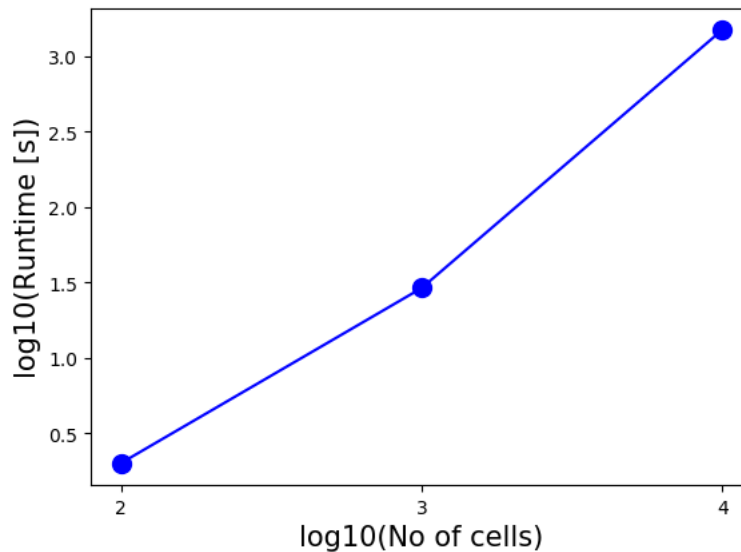

401  
402  
403  
404

**Figure 8. Scaling and computational speed.** Simulations were performed for 100, 1000 and 10000 cells for the unidirectional micro-TENN with diameter 180  $\mu\text{m}$  and length 2mm. The simulation runtime was 1.99 s, 28.93 s and 1500.45 s, respectively.



## 405 Discussion

406 As a neural network model, micro-TENNs permit systematic interrogation of different  
407 contributors to neuronal growth and development in a three-dimensional, anatomically-relevant  
408 environment. Indeed, by providing precise control of the neuronal subtypes within the  
409 engineered aggregates, the extracellular matrix and milieu, as well as the potential presence of  
410 supporting glial cells, the micro-TENNs provide an ideal platform for the evaluation of interplay  
411 between intrinsic and extrinsic mechanisms of neuronal growth and neurite extension. For  
412 instance, the 3D biomaterial columnar encasement provides an unprecedented engineered  
413 environment to study the multi-faceted and often synergistic contributions of haptotactic  
414 [mediated by ECM (e.g., laminin, collagen) and cell-surface ligands (e.g., cadherins, L1)],  
415 chemotactic [mediated by growth factor gradients (e.g., nerve growth factor, glial derived  
416 neurotrophic factor) that can be attractive or repulsive], and mechanotactic [dictated by  
417 substrate geometry (e.g., curvature) and mechanical properties (e.g., stiffness)] on axonal  
418 outgrowth and pathfinding [39], [40]. To date, micro-TENNs have been generated with lengths  
419 ranging from 1-30 mm, and inner diameters as small as 160 $\mu$ m [4]. Moreover, the introduction of  
420 “actuator proteins” such as channelrhodopsin-2 (a light-sensitive ion channel for optically-  
421 induced neuronal stimulation) and/or activity markers such as the fluorescent calcium reporter  
422 GCaMP also provide a range of techniques to both modulate and monitor neuronal activity  
423 within the micro-TENN over time [5]. This controllability makes micro-TENNs an ideal testbed  
424 for eliciting and studying different neuronal phenomena under a range of experimental  
425 conditions, all within a three-dimensional architecture more similar to the native brain than  
426 traditional 2D cultures or randomly organized 3D cultures.  
427

428 The existing models have been applied to study neuronal development *in vivo*, generally in the  
429 presence of molecular cues and under no specific geometric restrictions. Of note, those  
430 conditions differ from the growth conditions of micro-TENNs, in which gradients of external  
431 molecular cues are missing, the matrix is not neural tissue, and the growth space is a narrow  
432 tubular environment. Moreover, most of the existing models include complex growth  
433 mechanisms, leading to large computational cost. To compliment these previous efforts, there is  
434 a need for a computationally inexpensive model (due to the large population of neurons) that is  
435 capable of capturing the morphology of axonal growth within geometrical restrictions, including  
436 such important behaviors as neurite branching and axonal bundle formation/fasciculation.  
437

438 Here we present a fast/computationally inexpensive ad-hoc stochastic process-based simulation  
439 framework for the generation of large-scale unidirectional and bidirectional neuronal networks  
440 with realistic neuronal-axonal morphologies. These simulations faithfully reproduce the shape of  
441 micro-TENNs, which are engineered microtissue networks formed by simultaneous axonal  
442 outgrowth of many neurons in a constrained (i.e. encapsulated) space.

443 The main advantage of the model is its conceptual simplicity. It is built on basic principles, yet it  
444 can generate various complex morphologies observed experimentally. Another major advantage  
445 is the computational speed. The solution of the diffusion equation for each tip is explicit and  
446 analytic, thus removing the necessity for a numerical solution for the concentration and the  
447 concentration gradients. This makes the model fast and computationally cheap, particularly for a  
448 large number of growing neurons. Also, each growth tip represents a separate process, allowing  
449 for parallelization and additional speed up of computational.

450 A limitation to the model is the introduction of parameters that cannot be extracted directly from  
451 experimental data. This can be due to the data resolution or simply to an inability of reliably  
452 quantifying certain experimental aspects. The parameter space they form has to be scanned for  
453 values that allow realistic neuronal morphologies. Another limitation of the model is the lack of  
454 chemical cues in the unidirectional case. While the model allows for additional  
455 attraction/repulsion and guidance terms to be introduced, employing direct extrapolation from *in*  
456 *vivo* growth models would be challenging.

457 The model is designed to capture some basic biological principles of neuronal development and  
458 axonal outgrowth *in vitro*: the competition for space and resources between growth tips,  
459 formation of bundles, chirality, the dependence of branching probability on the growth time, and  
460 the deceleration of the growth rate over time. The growth rate values in our model successfully  
461 reproduce the experimental data. Further development of the model could introduce additional  
462 guidance and attraction/repulsion molecular cues once such experimental information is  
463 available, thereby systematically adding complexity and the ability to capture synergistic and/or  
464 competing features of intrinsic and extrinsic growth parameters.

## 465 Future Work

466 One major objective of building the Bidirectional Growth Model is to generate simulations of  
467 detailed neuron growth patterns to ultimately enable the study of functional connectivity that our  
468 research group has begun [41]. The neuronal growth patterns will be used to serve as the input  
469 of a spiking model to study the firing patterns within micro-TENNs and, following implantation, at  
470 the distal ends of micro-TENNs upon integration with the host brain neurons. In the output of the  
471 growth model, the framework can be used to extract detailed connectivity information.

472  
473 The neuronal growth patterns provide the information for searching locations of synaptic  
474 connections and help to establish the spiking network simulation. In biological neuronal  
475 networks, synapses form where tissues are in sufficiently close proximity. According to  
476 experimental design, synapses occur close to the aggregate, which are in the 100  $\mu m$  range  
477 from each end. Synaptic connectivity is estimated based on Euclidian distance (proximity  
478 criterion of 0.5  $\mu m$ ). **Figures 9A/2B** gives an example of the locations of these synaptic sites.

479

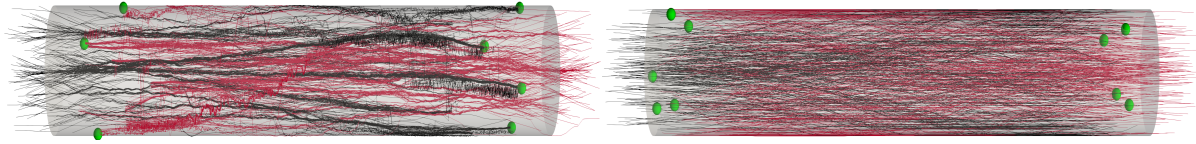

480

481

**Figure 9. Examples of growth pattern and synapses.** Illustration of synaptic formation close to the aggregate. The spheres indicate the synapses location. We consider that a synapse is formed when 2 fibers are closer than a threshold distance of  $0.5 \mu m$ . Synapses occur close to the aggregate (within  $100 \mu m$ ). The connectivity information is extracted for the spiking network simulation. (A) The output image of the model: synaptic formation in bidirectional micro-TENNs with axonal bundles. (B) The output image of the model: synaptic formation in bidirectional micro-TENNs with no axonal bundles.

## 482 Conclusion

483 The neuronal and axonal growth structures obtained through this model provide a complete  
484 growth and connectivity pattern within a custom micro-tissue neural network. The model  
485 reproduces both the micro-TENN architecture and the axonal growth rate and distribution. This  
486 framework will enable further assessment of structural and functional connectivity, for instance  
487 an analysis of synaptic integration that happens close to the aggregate or even outside the  
488 micro-column. The extracted information of synaptic connectivity close to the aggregate and the  
489 synapse at distal end of micro-TENNs will be the a topic of a future functional connectivity study.  
490 We intend to build on this model in order to better understand the spiking network properties of  
491 micro-TENNs as so-called “living electrodes” for neuromodulation as well as anatomically-  
492 inspired constructs for white matter pathway reconstruction..

## 493 Acknowledgements:

494 Research reported in this publication was supported by the National Institutes of Health through  
495 the Brain Initiative [U01-NS094340 (Cullen & Kraft)] and the National Science Foundation  
496 through a Graduate Research Fellowship [DGE-1321851 (Adewole)]. Computations for this  
497 research were performed on the Pennsylvania State University’s Institute for CyberScience  
498 Advanced CyberInfrastructure (ICS-ACI).

## 499 References

- 500 [1] D. K. Cullen, M. D. Tang-Schomer, L. a. Struzyna, A. R. Patel, V. E. Johnson, J. a. Wolf,  
501 and D. H. Smith, “Microtissue Engineered Constructs with Living Axons for Targeted  
502 Nervous System Reconstruction,” *Tissue Eng. Part A*, vol. 18, p. 120817094501006, 2012.
- 503 [2] J. P. Harris, L. A. Struzyna, P. L. Murphy, D. O. Adewole, E. Kuo, and D. K. Cullen,  
504 “Advanced biomaterial strategies to transplant preformed micro-tissue engineered neural  
505 networks into the brain,” *J. Neural Eng.*, vol. 13, no. 1, 2016.
- 506 [3] L. A. Struzyna, J. A. Wolf, C. J. Mietus, D. O. Adewole, H. I. Chen, D. H. Smith, and D. K.  
507 Cullen, “Rebuilding Brain Circuitry with Living Micro-Tissue Engineered Neural Networks,”  
508 *Tissue Eng. Part A*, vol. 21, no. 21–22, pp. 2744–2756, 2015.
- 509 [4] L. A. Struzyna, D. O. Adewole, W. J. Gordián-Vélez, M. R. Grovola, J. C. Burrell, K. S.  
510 Katiyar, D. Petrov, J. P. Harris, and D. K. Cullen, “Anatomically Inspired Three-dimensional

- 511 Micro-tissue Engineered Neural Networks for Nervous System Reconstruction, Modulation,  
512 and Modeling,” *J. Vis. Exp. JoVE*, no. 123, 2017.
- 513 [5] D. O. Adewole, L. A. Struzyna, J. P. Harris, A. D. Nemes, J. C. Burrell, D. Petrov, R. H.  
514 Kraft, H. I. Chen, M. D. Serruya, J. A. Wolf, and D. K. Cullen, “Optically-Controlled ‘Living  
515 Electrodes’ with Long-Projecting Axon Tracts for a Synaptic Brain-Machine Interface,”  
516 *bioRxiv*, Jan. 2018.
- 517 [6] L. A. Struzyna, K. D. Browne, Z. D. Brodnik, J. C. Burrell, J. P. Harris, H. I. Chen, J. A.  
518 Wolf, K. V. Panzer, J. Lim, J. E. Duda, R. A. España, and D. K. Cullen, “Tissue engineered  
519 nigrostriatal pathway for treatment of Parkinson’s disease,” *J. Tissue Eng. Regen. Med.*,  
520 vol. 12, no. 7, pp. 1702–1716.
- 521 [7] F. Zubler and R. Douglas, “A Framework for Modeling the Growth and Development of  
522 Neurons and Networks,” *Front. Comput. Neurosci.*, vol. 3, Nov. 2009.
- 523 [8] G. A. Ascoli, J. L. Krichmar, R. Scorcioni, S. J. Nasuto, S. L. Senft, and G. L. Krichmar,  
524 “Computer Generation and Quantitative Morphometric Analysis of Virtual Neurons,” *Anat.*  
525 *Embryol. (Berl.)*, vol. 204, no. 4, pp. 283–301, Oct. 2001.
- 526 [9] P. Hamilton, “A Language to Describe the Growth of Neurites,” *Biol. Cybern.*, vol. 68, no. 6,  
527 pp. 559–565, Apr. 1993.
- 528 [10] B. P. Graham and A. van Ooyen, “Transport Limited Effects in a Model of Dendritic  
529 Branching,” *J. Theor. Biol.*, vol. 230, no. 3, pp. 421–432, Oct. 2004.
- 530 [11] W. Kliemann, “A Stochastic Dynamical Model for the Characterization of the Geometrical  
531 Structure of Dendritic Processes,” *Bull. Math. Biol.*, vol. 49, no. 2, p. 135, Mar. 1987.
- 532 [12] J. Van Pelt, A. E. Dityatev, and H. B. M. Uylings, “Natural Variability in the Number of  
533 Dendritic Segments: Model-Based Inferences About Branching During Neurite Outgrowth,”  
534 *J. Comp. Neurol.*, vol. 387, no. 3, pp. 325–340, Oct. 1997.
- 535 [13] A. L. Carriquiry, W. P. Ireland, W. Kliemann, and E. Uemura, “Statistical Evaluation of  
536 Dendritic Growth Models,” *Bull. Math. Biol.*, vol. 53, no. 4, pp. 579–589, Jul. 1991.
- 537 [14] J. A. Villacorta, J. Castro, P. Negredo, and C. Avendaño, “Mathematical Foundations of the  
538 Dendritic Growth Models,” *J. Math. Biol.*, vol. 55, no. 5–6, pp. 817–859, Nov. 2007.
- 539 [15] K.-A. Norton, M. Wininger, G. Bhanot, S. Ganesan, N. Barnard, and T. Shinbrot, “A 2d  
540 Mechanistic Model of Breast Ductal Carcinoma in Situ (dcis) Morphology and Progression,”  
541 *J. Theor. Biol.*, vol. 263, no. 4, pp. 393–406, Apr. 2010.
- 542 [16] T. A. HELY, B. GRAHAM, and A. VAN OUYEN, “A Computational Model of Dendrite  
543 Elongation and Branching Based on MAP2 Phosphorylation,” *J. Theor. Biol.*, vol. 210, no.  
544 3, pp. 375–384, Jun. 2001.
- 545 [17] A. Q. Cai, K. A. Landman, and B. D. Hughes, “Modelling Directional Guidance and Motility  
546 Regulation in Cell Migration,” *Bull. Math. Biol.*, vol. 68, no. 1, p. 25, Jan. 2006.
- 547 [18] D. Kiddie, D. McLean, A. Van Ooyen, and B. Graham, “Biologically plausible models of  
548 neurite outgrowth,” in *Development, Dynamics and Pathology of Neuronal Networks: From*  
549 *Molecules to Functional Circuits*, 1st ed., vol. 147, .
- 550 [19] G. J. Goodhill, M. Gu, and J. S. Urbach, “Predicting Axonal Response to Molecular  
551 Gradients with a Computational Model of Filopodial Dynamics,” *Neural Comput.*, vol. 16,  
552 no. 11, pp. 2221–2243, Nov. 2004.
- 553 [20] S. Maskery and T. Shinbrot, “Deterministic and Stochastic Elements of Axonal Guidance,”  
554 *Annu. Rev. Biomed. Eng.*, vol. 7, pp. 187–221, 2005.
- 555 [21] A. Stepanyants, J. A. Hirsch, L. M. Martinez, Z. F. Kisvárdy, A. S. Ferecskó, and D. B.  
556 Chklovskii, “Local Potential Connectivity in Cat Primary Visual Cortex,” *Cereb. Cortex*, vol.  
557 18, no. 1, pp. 13–28, Jan. 2008.
- 558 [22] P. Lansky and C. Smith, “One-Dimensional Stochastic Diffusion Models of Neuronal  
559 Activity and Related First Passage Time Problems,” *Trends Biol. Cybernetics*, vol. 1, p.  
560 pp.153-162, 1990.



- 561 [23] S. K. Srinivasan and G. Sampath, "Stochastic Models For Spike Trains Of Single  
562 Neurons," in *Springer Science & Business Media*, vol. 16, 2013.
- 563 [24] H. Tuckwell, *Stochastic Processes in the Neurosciences*. Society for Industrial and Applied  
564 Mathematics, 1989.
- 565 [25] G. L. Yang and T. C. Chen, "On Statistical Methods in Neuronal Spike-Train Analysis,"  
566 *Math. Biosci.*, vol. 38, no. 1, pp. 1–34, Jan. 1978.
- 567 [26] P. I. M. Johannesma, "Diffusion Models for the Stochastic Activity of Neurons," in *Neural  
568 Networks*, E. R. Caianiello, Ed. Springer Berlin Heidelberg, 1968, pp. 116–144.
- 569 [27] P. Lánský and V. Lánská, "Diffusion Approximation of the Neuronal Model with Synaptic  
570 Reversal Potentials," *Biol. Cybern.*, vol. 56, no. 1, pp. 19–26, Apr. 1987.
- 571 [28] F. Karube, Y. Kubota, and Y. Kawaguchi, "Axon Branching and Synaptic Bouton  
572 Phenotypes in GABAergic Nonpyramidal Cell Subtypes," *J. Neurosci.*, vol. 24, no. 12, pp.  
573 2853–2865, Mar. 2004.
- 574 [29] K. Kalil and E. W. Dent, "Branch Management: Mechanisms of Axon Branching in the  
575 Developing Vertebrate Cns," *Nat. Rev. Neurosci.*, vol. 15, no. 1, pp. 7–18, Jan. 2014.
- 576 [30] J. J. J. Hjorth, J. van Pelt, H. D. Mansvelder, and A. van Ooyen, "Competitive Dynamics  
577 during Resource-Driven Neurite Outgrowth," *PLoS ONE*, vol. 9, no. 2, Feb. 2014.
- 578 [31] G.-H. Li and C.-D. Qin, "A Model for Neurite Growth and Neuronal Morphogenesis," *Math.  
579 Biosci.*, vol. 132, no. 1, pp. 97–110, Feb. 1996.
- 580 [32] D. M. Suter and K. E. Miller, "The Emerging Role of Forces in Axonal Elongation," *Prog.  
581 Neurobiol.*, vol. 94, no. 2, pp. 91–101, Jul. 2011.
- 582 [33] M. O'Toole, R. Latham, R. M. Baqri, and K. E. Miller, "Modeling Mitochondrial Dynamics  
583 During in Vivo Axonal Elongation," *J. Theor. Biol.*, vol. 255, no. 4, pp. 369–377, Dec. 2008.
- 584 [34] M. P. Van Veen and J. Van Pelt, "Neuritic Growth Rate Described by Modeling Microtubule  
585 Dynamics," *Bull. Math. Biol.*, vol. 56, no. 2, pp. 249–273, Mar. 1994.
- 586 [35] M. O'Toole, P. Lamoureux, and K. E. Miller, "A Physical Model of Axonal Elongation:  
587 Force, Viscosity, and Adhesions Govern the Mode of Outgrowth," *Biophys. J.*, vol. 94, no.  
588 7, pp. 2610–2620, Apr. 2008.
- 589 [36] B. P. Graham, K. Lauchlan, and D. R. Mclean, "Dynamics of Outgrowth in a Continuum  
590 Model of Neurite Elongation," *J. Comput. Neurosci.*, vol. 20, no. 1, p. 43, Feb. 2006.
- 591 [37] D. A. Gibson and L. Ma, "Developmental Regulation of Axon Branching in the Vertebrate  
592 Nervous System," *Development*, vol. 138, no. 2, pp. 183–195, Jan. 2011.
- 593 [38] A. van Ooyen, J. van Pelt, and H. Uylings, "Modeling Dendritic Geometry and the  
594 Development of Nerve Connections," in *Computational Neuroscience*, CRC Press, 2000.
- 595 [39] D. K. Cullen, J. A. Wolf, V. N. Vernekar, J. Vukasinovic, and M. C. LaPlaca, "Neural tissue  
596 engineering and biohybridized microsystems for neurobiological investigation in vitro (Part  
597 1)," *Crit. Rev. Biomed. Eng.*, vol. 39, no. 3, 2011.
- 598 [40] D. K. Cullen, M. D. Tang-Schomer, L. A. Struzyna, A. R. Patel, V. E. Johnson, J. A. Wolf,  
599 and D. H. Smith, "Microtissue engineered constructs with living axons for targeted nervous  
600 system reconstruction," *Tissue Eng. Part A*, vol. 18, no. 21–22, pp. 2280–2289, 2012.
- 601 [41] A. V. Dhobale, D. O. Adewole, A. H. W. Chan, T. Marinov, M. D. Serruya, R. H. Kraft, and  
602 D. K. Cullen, "Assessing functional connectivity across 3D tissue engineered axonal tracts  
603 using calcium fluorescence imaging," *J. Neural Eng.*, vol. 15, no. 5, p. 056008, Jun. 2018.  
604
